# Supplementary material
Source: publisher figshare collection journal article supplement (https://asha.figshare.com/articles/dataset/_/16746454)

# **Supplemental Material S4. Performance of individual children.**

**Table 1.** Number of words correct at the end of the last training day out of 9 trained forms. Only words produced with 100% phonological precision are included, with an exception for liquid simplification productions made for /gramə/. See Supplemental Material S1.

|                           | <b>Group</b> | <b>Total Training Days</b> | <b>Words Correct Free Recall</b> | <b>Words Correct Cued Recall</b> | <b>Words Demonstrated Criterion</b> |
|---------------------------|--------------|----------------------------|----------------------------------|----------------------------------|-------------------------------------|
| 19J0611                   | TD           | 2                          | 4                                | 9                                | 9                                   |
| 19J0620                   | TD           | 4                          | 9                                | 9                                | 9                                   |
| 18J0580                   | TD           | 4                          | 7                                | 9                                | 9                                   |
| 15C0194                   | TD           | 5                          | 7                                | 9                                | 9                                   |
| 19J0603                   | TD           | 6                          | 3                                | 8                                | 6                                   |
| 19J0584                   | TD           | 6                          | 5                                | 8                                | 7                                   |
| 19J0673                   | TD           | 6                          | 5                                | 7                                | 6                                   |
| 18J0576                   | TD           | 6                          | 6                                | 7                                | 7                                   |
| 18J0549                   | TD           | 6                          | 4                                | 7                                | 6                                   |
| Mean (standard deviation) |              | 5.00 (1.41)                | 5.56 (1.88)                      | 8.11 (0.93)                      | 7.56 (1.42)                         |
|                           | <b>Group</b> | <b>Total Training Days</b> | <b>Words Correct Free Recall</b> | <b>Words Correct Cued Recall</b> | <b>Words Demonstrated Criterion</b> |
| 18J0550                   | DLD          | 5                          | 5                                | 9                                | 9                                   |
| 18J0511                   | DLD          | 6                          | 6                                | 8                                | 7                                   |
| 18J0563                   | DLD          | 6                          | 6                                | 6                                | 6                                   |
| 18J0554                   | DLD          | 6                          | 3                                | 6                                | 6                                   |
| 19J0587                   | DLD          | 6                          | 6                                | 6                                | 6                                   |
| 18J0483                   | DLD          | 6                          | 4                                | 5                                | 4                                   |
| 18J0474                   | DLD          | 6                          | 2                                | 4                                | 3                                   |
| 18J0581                   | DLD          | 6                          | 1                                | 2                                | 2                                   |
| 18J0513                   | DLD          | 6                          | 1                                | 2                                | 1                                   |
| Mean (standard deviation) |              | 5.88 (0.33)                | 3.78 (2.11)                      | 5.33 (2.40)                      | 4.89 (2.57)                         |

**Figure 1.** The number of words children produced correctly at the end of each training session across training days.

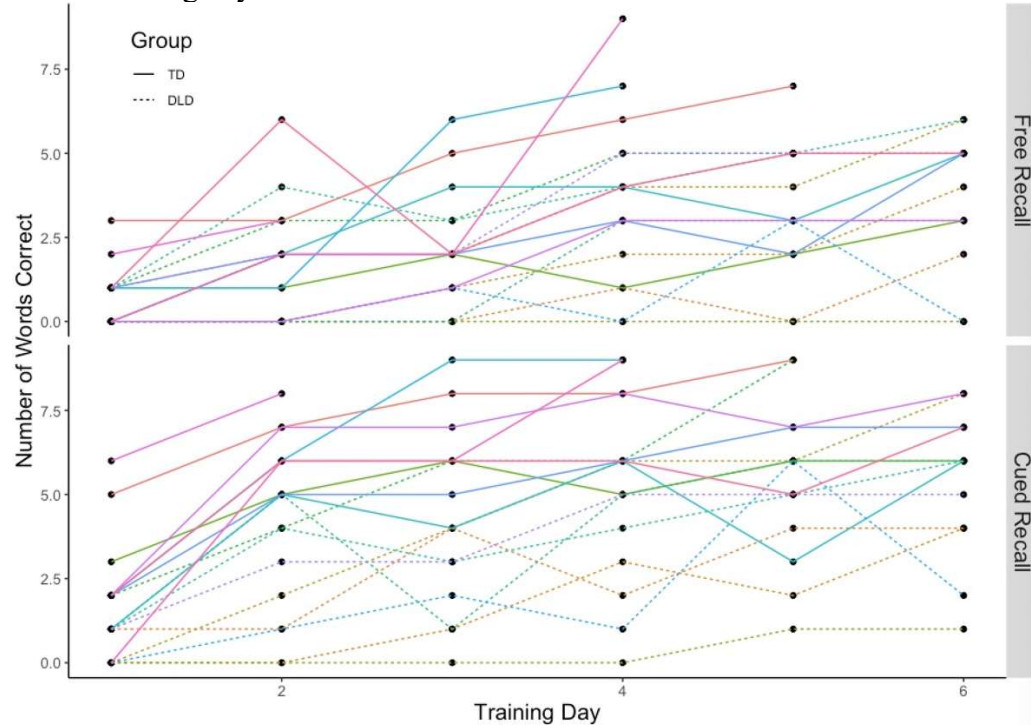

**Figure 2.** The average phonological precision of productions for each child at the end of each session across training days.

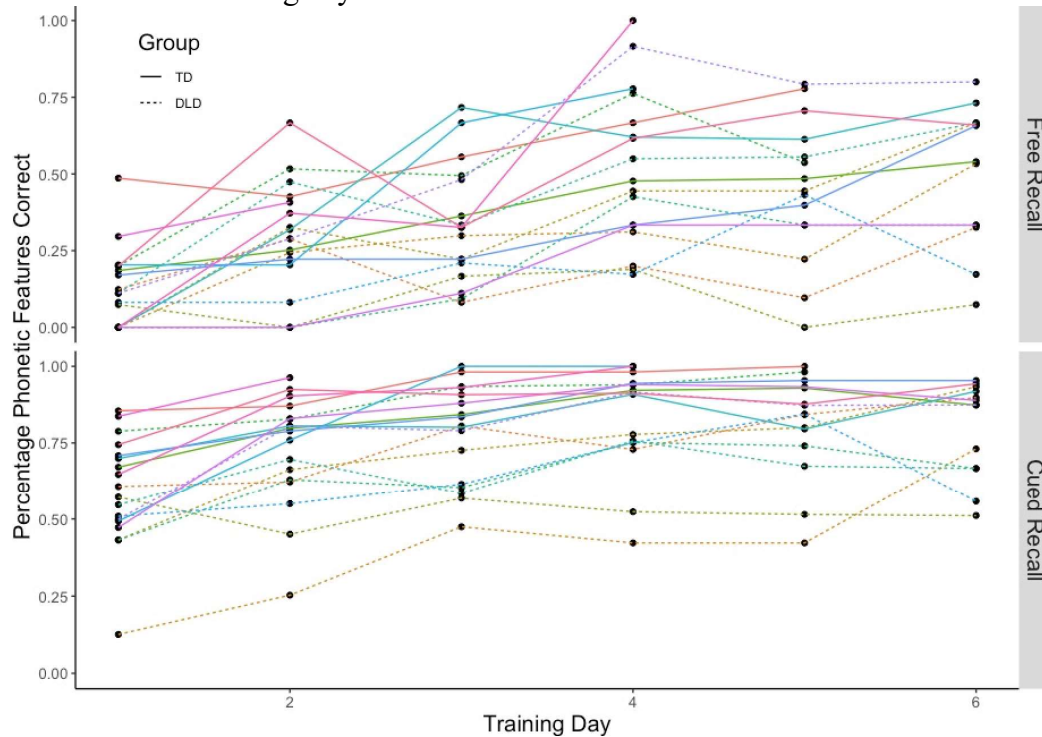

Supplement: Supplementary file 1 [file 1]
