# Supplementary material
Source: publisher figshare collection journal article supplement (https://asha.figshare.com/articles/dataset/_/16746454)
Supplement: Supplementary file 4 [file 1]

**Supplemental Material S3.** Final model for encoding with nonword repetition scores and PPVT scores.

To assess how verbal working memory related to phonological precision of productions at the end of each training day, we replaced the Fixed Effect of Group (DLD, TD) with non-word repetition score (i.e., percentage of phonemes correct, Dollaghan & Campbell, 1998) in the final model. There is no overlap between groups in the NWR score. Thus, we cannot include Group and NWR score in the same model due to multicollinearity. This model revealed that NWR score was significantly related to phonological precision of productions in the word learning task ( $B = .003, t = 2.13, p = .05$ ). In a similar manner, we ran an additional model with PPVT-4 score replacing Group to assess how receptive vocabulary related to performance across the training days. This model revealed that PPVT-4 score was significantly related to phonological precision of productions in the word learning task ( $B = .004, t = 2.43, p = .03$ ).

**Table 1.** Final model for word learning performance across training days, phonological precision score. Group (DLD, TD) was replaced by percentage phonemes correct in the non-word repetition task (Dollaghan & Campbell, 1998).

| <b>Percentage of Phonetic Features Produced Correctly</b> |                 |                       |                |                    |
|-----------------------------------------------------------|-----------------|-----------------------|----------------|--------------------|
|                                                           | <b>Estimate</b> | <b>Standard error</b> | <b>t value</b> | <b>Pr(&gt; z )</b> |
| Intercept                                                 | 0.15            | 0.04                  | 3.20           | < .01              |
| Non-word repetition                                       | 0.003           | 0.001                 | 2.13           | 0.05               |
| Day                                                       | 0.08            | 0.01                  | 7.57           | < .001             |
| Cue <sup>a</sup>                                          | 0.40            | 0.02                  | 24.05          | < .001             |
| Biological Sex <sup>b</sup>                               | 0.10            | 0.05                  | 2.05           | 0.06               |
| Nonword repetition × Cue                                  | 0.003           | 0.001                 | 3.04           | < .01              |

<sup>a</sup>Reference group is Free Recall. <sup>b</sup>Reference group is Female.

**Table 2.** Final model for word learning performance across training days, phonological precision score. Group (DLD, TD) was replaced by PPVT score.

| <b>Percentage of Phonetic Features Produced Correctly</b> |                 |                       |                |                    |
|-----------------------------------------------------------|-----------------|-----------------------|----------------|--------------------|
|                                                           | <b>Estimate</b> | <b>Standard error</b> | <b>t value</b> | <b>Pr(&gt; z )</b> |
| Intercept                                                 | 0.15            | 0.05                  | 3.16           | < .01              |
| PPVT-4                                                    | 0.004           | 0.002                 | 2.43           | 0.03               |
| Day                                                       | 0.08            | 0.01                  | 7.57           | < .001             |
| Cue <sup>a</sup>                                          | 0.40            | 0.02                  | 23.99          | < .001             |
| Biological Sex <sup>b</sup>                               | 0.08            | 0.05                  | 1.60           | 0.13               |
| PPVT × Cue                                                | 0.001           | 0.001                 | 1.03           | 0.30               |

<sup>a</sup>Reference group is Free Recall. <sup>b</sup>Reference group is Female.
